# Supplementary material
Source: publisher site journal article supplement (https://www.dovepress.com/article/243836)
Supplement: Supplementary file 1 [file get_supplementary_file.php]

Survival proportions of the hvKp strains

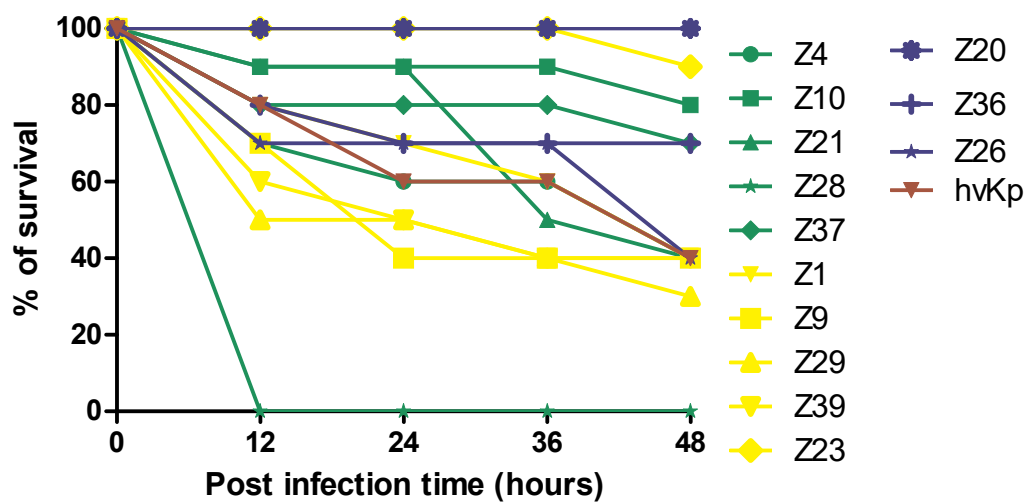

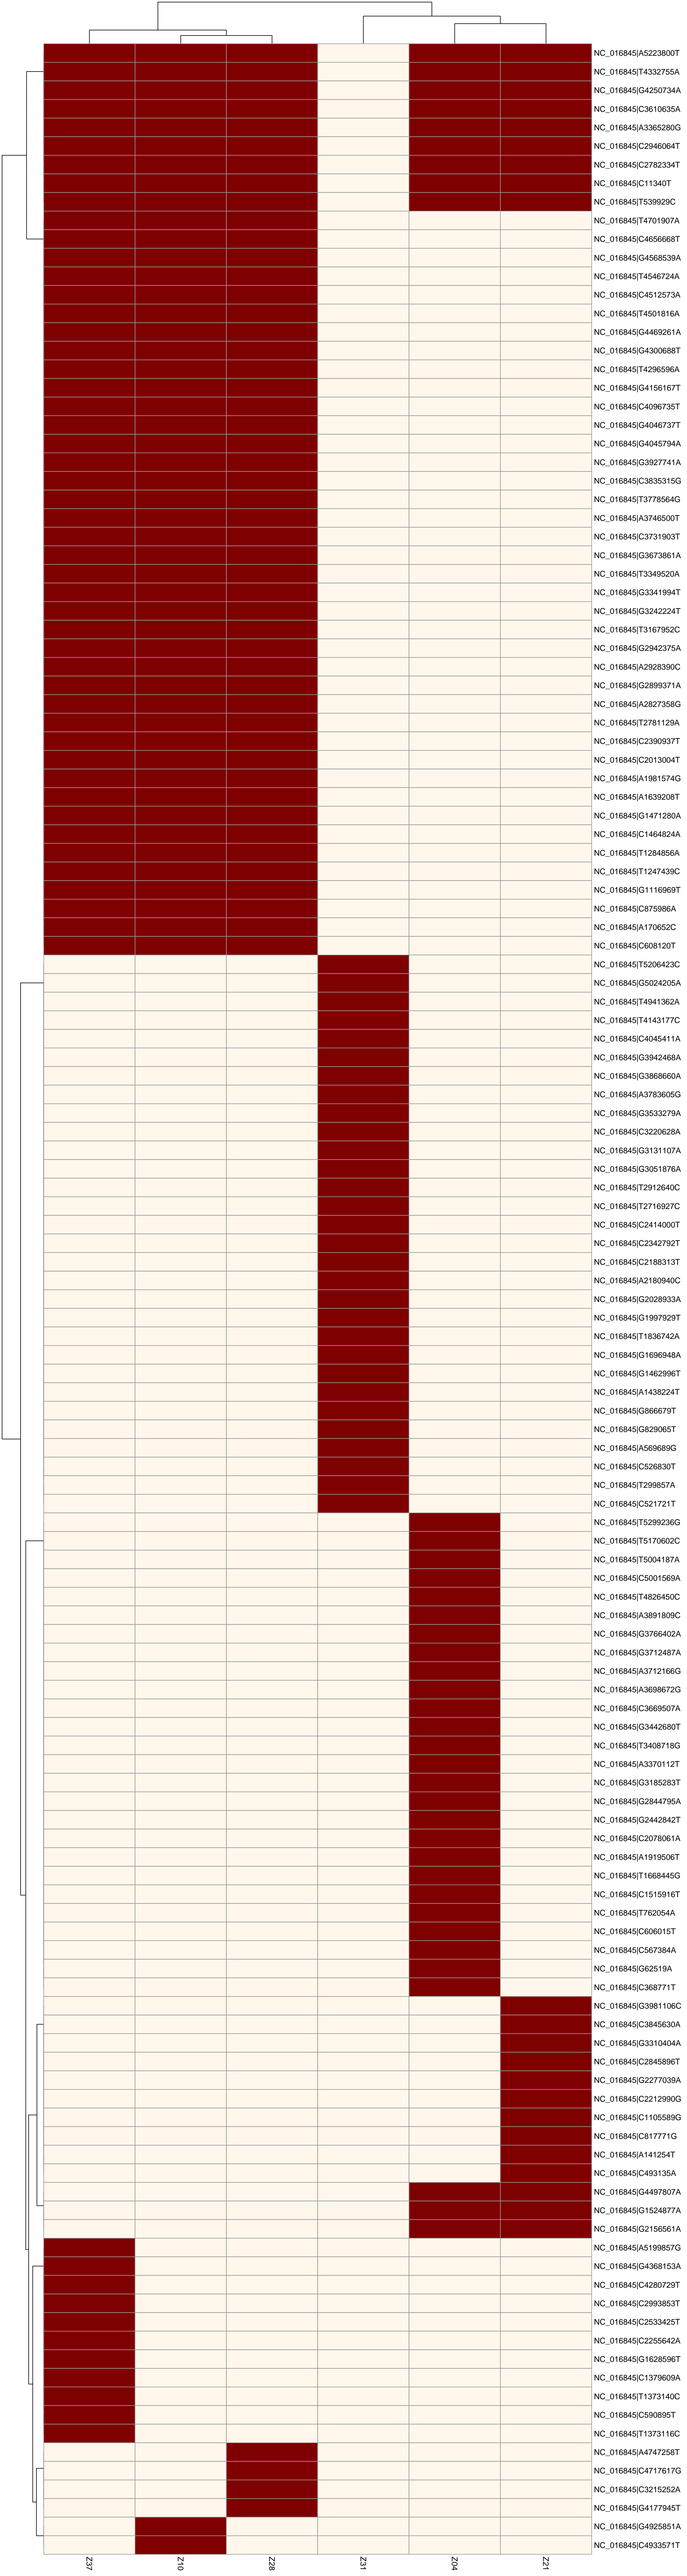

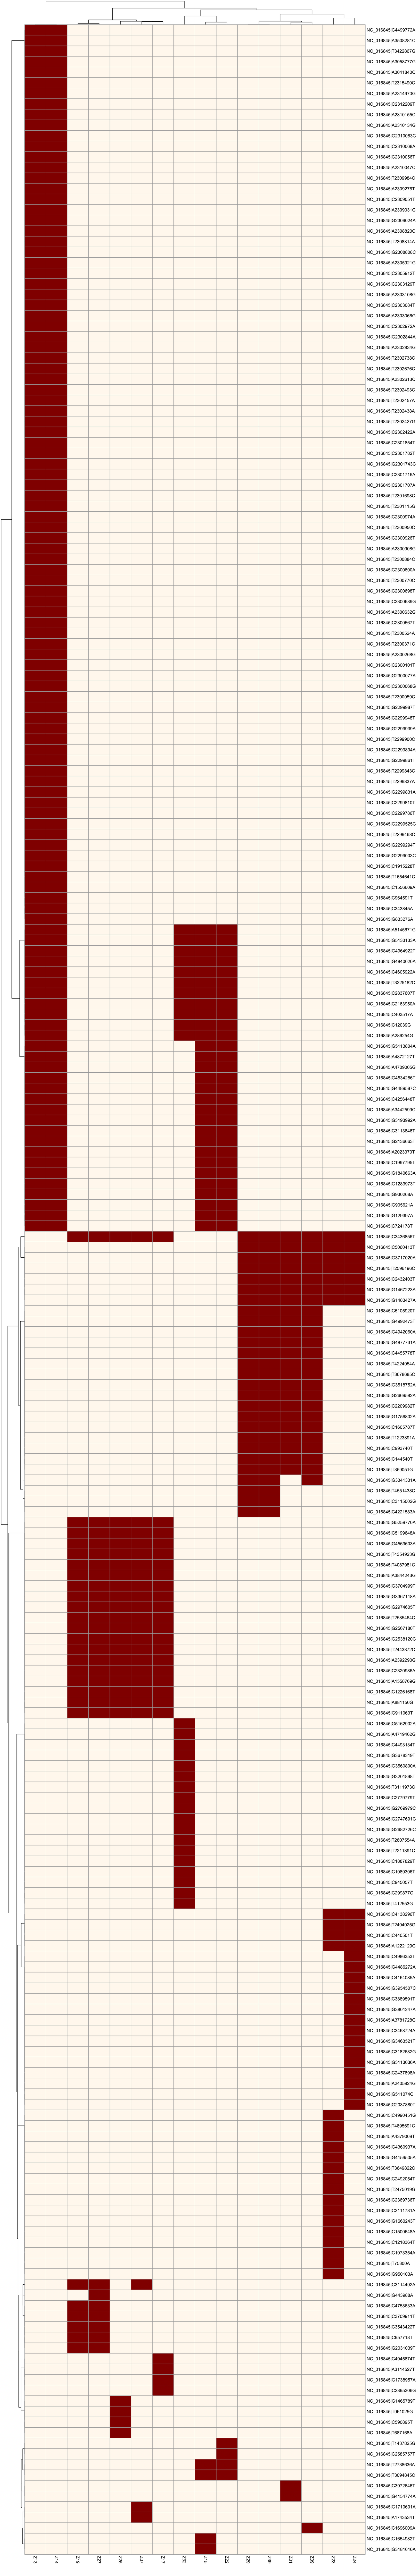

NC\_016845[C4499772A]  
NC\_016845[A3508281C]  
NC\_016845[T3422867G]  
NC\_016845[A3058777G]  
NC\_016845[A3041840C]  
NC\_016845[T2315490C]  
NC\_016845[A2314970G]  
NC\_016845[C2312209T]  
NC\_016845[A2310155C]  
NC\_016845[A2310134G]  
NC\_016845[G2310083C]  
NC\_016845[C2310068A]  
NC\_016845[C2310056T]  
NC\_016845[A2310047C]  
NC\_016845[T2309984C]  
NC\_016845[A2309276T]  
NC\_016845[C2309051T]  
NC\_016845[A2309031G]  
NC\_016845[G2309024A]  
NC\_016845[A2308820C]  
NC\_016845[T2308814A]  
NC\_016845[G2308808C]  
NC\_016845[G2305921G]  
NC\_016845[C2305912T]  
NC\_016845[C2303129T]  
NC\_016845[A2303108G]  
NC\_016845[C2303084T]  
NC\_016845[A2303066G]  
NC\_016845[C2302972A]  
NC\_016845[G2302844A]  
NC\_016845[A2302834G]  
NC\_016845[T2302738C]  
NC\_016845[T2302676C]  
NC\_016845[A2302613C]  
NC\_016845[T2302493C]  
NC\_016845[T2302457A]  
NC\_016845[T2302438A]  
NC\_016845[T2302427G]  
NC\_016845[C2302422A]  
NC\_016845[C2301854A]  
NC\_016845[C2301782A]  
NC\_016845[G2301743C]  
NC\_016845[C2301716A]  
NC\_016845[C2301707A]  
NC\_016845[T2301698C]  
NC\_016845[T2301115G]  
NC\_016845[C2300974A]  
NC\_016845[T2300950C]  
NC\_016845[C2300926T]  
NC\_016845[A2300908G]  
NC\_016845[T2300884C]  
NC\_016845[C2300800A]  
NC\_016845[T2300770C]  
NC\_016845[C2300698T]  
NC\_016845[C2300689G]  
NC\_016845[A2300632G]  
NC\_016845[C2300567T]  
NC\_016845[T2300524A]  
NC\_016845[T2300371C]  
NC\_016845[A2300268G]  
NC\_016845[C2300101T]  
NC\_016845[G2300077A]  
NC\_016845[C2300068G]  
NC\_016845[T2300059C]  
NC\_016845[G2299987T]  
NC\_016845[C2299948T]  
NC\_016845[G2299939A]  
NC\_016845[T2299900C]  
NC\_016845[G2299894A]  
NC\_016845[G2299861T]  
NC\_016845[T2299843C]  
NC\_016845[T2299837A]  
NC\_016845[G2299831A]  
NC\_016845[C2299810T]  
NC\_016845[C2299786T]  
NC\_016845[G2299525C]  
NC\_016845[T2299468C]  
NC\_016845[G2299294T]  
NC\_016845[G2299003C]  
NC\_016845[C1915228T]  
NC\_016845[T1654641C]  
NC\_016845[C1556609A]  
NC\_016845[C964591T]  
NC\_016845[C343845A]  
NC\_016845[G333276A]  
NC\_016845[A5145671G]  
NC\_016845[G5133133A]  
NC\_016845[G4964922T]  
NC\_016845[G4840020A]  
NC\_016845[C4605922A]  
NC\_016845[T3225182C]  
NC\_016845[C2837607T]  
NC\_016845[C2163950A]  
NC\_016845[C403517A]  
NC\_016845[C12039G]  
NC\_016845[A286254G]  
NC\_016845[G5113804A]  
NC\_016845[A4872127T]  
NC\_016845[A4709005G]  
NC\_016845[G4534286T]  
NC\_016845[G4489587C]  
NC\_016845[C4256448T]  
NC\_016845[A3442599C]  
NC\_016845[G3193992A]  
NC\_016845[C3113846T]  
NC\_016845[G2136663T]  
NC\_016845[A2023370T]  
NC\_016845[C1997795T]  
NC\_016845[G1840663A]  
NC\_016845[G1283973T]  
NC\_016845[G930268A]  
NC\_016845[G905621A]  
NC\_016845[G129397A]  
NC\_016845[C7241787A]  
NC\_016845[C3438856T]  
NC\_016845[C5060413T]  
NC\_016845[G3717020A]  
NC\_016845[T2596196C]  
NC\_016845[C2432403T]  
NC\_016845[G1467223A]  
NC\_016845[C5105920T]  
NC\_016845[G4992473T]  
NC\_016845[G4942060A]  
NC\_016845[G4877731A]  
NC\_016845[C4455778T]  
NC\_016845[T4224054A]  
NC\_016845[T3678685C]  
NC\_016845[G3518752A]  
NC\_016845[G2669582A]  
NC\_016845[C2209982T]  
NC\_016845[G1756802A]  
NC\_016845[C1605787T]  
NC\_016845[T1223891A]  
NC\_016845[C993740T]  
NC\_016845[C144540T]  
NC\_016845[T359051G]  
NC\_016845[G3341331A]  
NC\_016845[T4551438C]  
NC\_016845[C3115002G]  
NC\_016845[C4221583A]  
NC\_016845[G5259770A]  
NC\_016845[C5199648A]  
NC\_016845[G4589603A]  
NC\_016845[T4354923G]  
NC\_016845[T4087981C]  
NC\_016845[A3844243G]  
NC\_016845[G3704999T]  
NC\_016845[G3367118A]  
NC\_016845[C2974605T]  
NC\_016845[T2585464C]  
NC\_016845[G2567180T]  
NC\_016845[G2538120C]  
NC\_016845[T2443872C]  
NC\_016845[A2392290G]  
NC\_016845[C2320986A]  
NC\_016845[A1558769G]  
NC\_016845[C1226168T]  
NC\_016845[A881150G]  
NC\_016845[G911063T]  
NC\_016845[G5162902A]  
NC\_016845[A4719462G]  
NC\_016845[C4493134T]  
NC\_016845[G3678319T]  
NC\_016845[G3560800A]  
NC\_016845[G3201898T]  
NC\_016845[T3111973C]  
NC\_016845[C2779779T]  
NC\_016845[G2769979C]  
NC\_016845[G2747691C]  
NC\_016845[G2682726C]  
NC\_016845[T2607554A]  
NC\_016845[T2211391C]  
NC\_016845[C1887829T]  
NC\_016845[C1089306T]  
NC\_016845[C945057T]  
NC\_016845[C299877G]  
NC\_016845[T412553G]  
NC\_016845[C4138296T]  
NC\_016845[T2404025G]  
NC\_016845[C440501T]  
NC\_016845[A1222129G]  
NC\_016845[C4986353T]  
NC\_016845[G4486272A]  
NC\_016845[C4164085A]  
NC\_016845[G3954507C]  
NC\_016845[C3889591T]  
NC\_016845[G3801247A]  
NC\_016845[A3781728G]  
NC\_016845[C3468724A]  
NC\_016845[G3483521T]  
NC\_016845[C3182882G]  
NC\_016845[G3113036A]  
NC\_016845[C2437898A]  
NC\_016845[A2405924G]  
NC\_016845[G511074C]  
NC\_016845[G2037880T]  
NC\_016845[C4990451G]  
NC\_016845[T4895691C]  
NC\_016845[A4379009T]  
NC\_016845[G4360937A]  
NC\_016845[G4159505A]  
NC\_016845[T3649822C]  
NC\_016845[C2492054T]  
NC\_016845[T2475019G]  
NC\_016845[C2369736T]  
NC\_016845[C2111781A]  
NC\_016845[G1660243T]  
NC\_016845[C1500648A]  
NC\_016845[C1218364T]  
NC\_016845[C1073354A]  
NC\_016845[T75300A]  
NC\_016845[G950103A]  
NC\_016845[C3114492A]  
NC\_016845[G443988A]  
NC\_016845[C4758633A]  
NC\_016845[C3709911T]  
NC\_016845[C3543422T]  
NC\_016845[C957718T]  
NC\_016845[G2031039T]  
NC\_016845[C4045874T]  
NC\_016845[A3114527T]  
NC\_016845[G1738957A]  
NC\_016845[C2395306G]  
NC\_016845[G1465789T]  
NC\_016845[T961025G]  
NC\_016845[C590895T]  
NC\_016845[T687168A]  
NC\_016845[T1437825G]  
NC\_016845[C2585757T]  
NC\_016845[T2738636A]  
NC\_016845[T3094845C]  
NC\_016845[C3972646T]  
NC\_016845[G4154774A]  
NC\_016845[G1710601A]  
NC\_016845[A1743534T]  
NC\_016845[C1696009A]  
NC\_016845[C1654982T]  
NC\_016845[G3181616A]

Z13

Z14

Z19

Z27

Z25

Z07

Z17

Z22

Z15

Z22

Z29

Z19

Z01

Z09

Z23

Z24

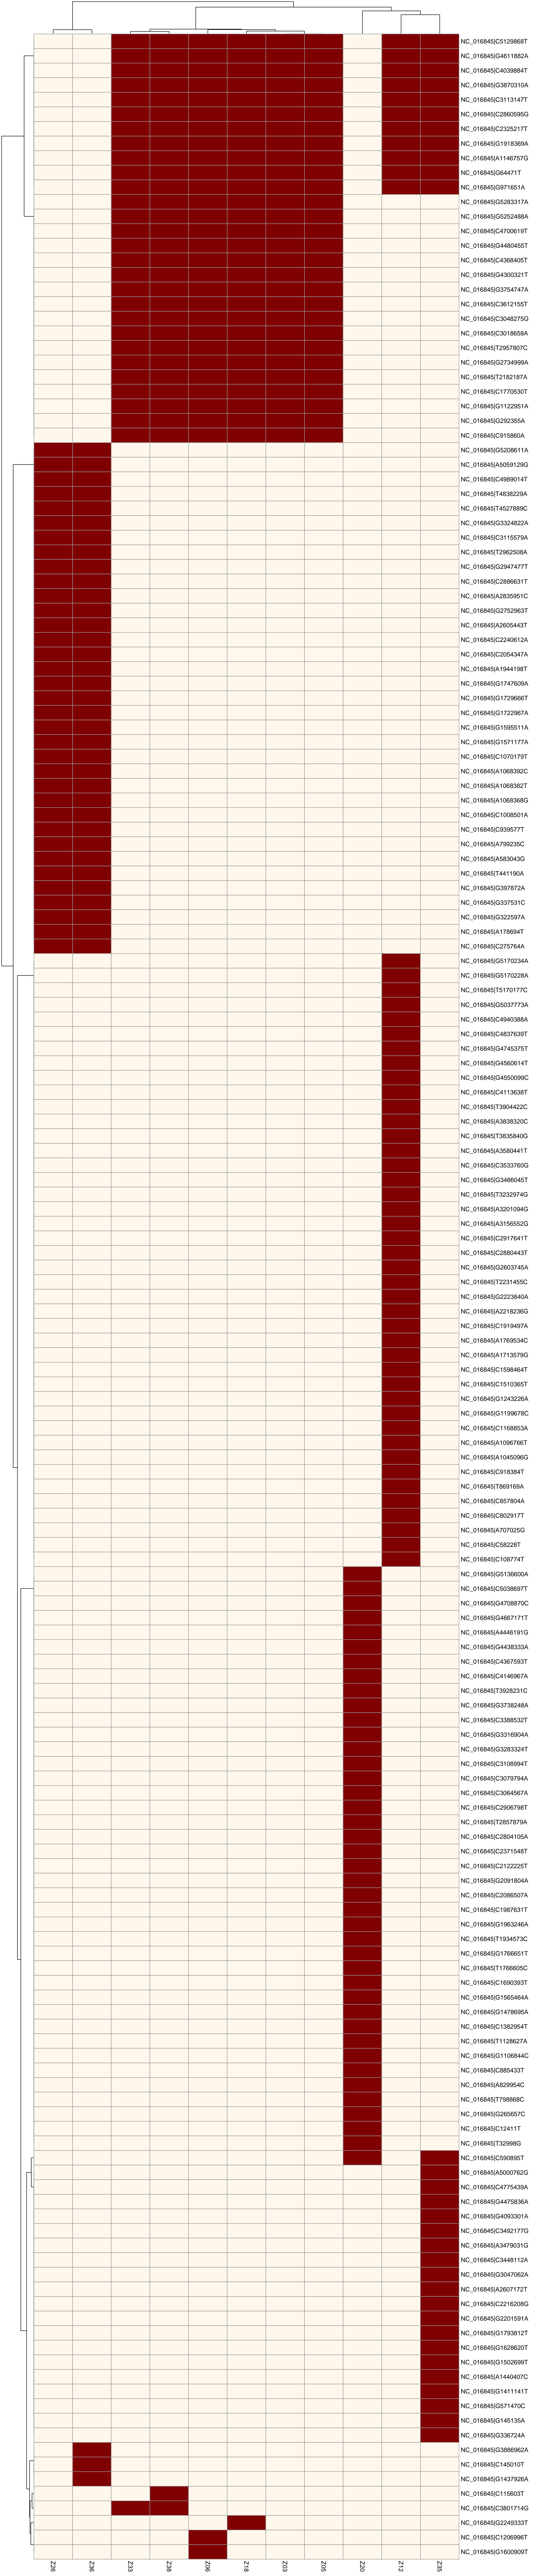

NC\_016845[C5129868T  
NC\_016845[G4611882A  
NC\_016845[C4039884T  
NC\_016845[G3870310A  
NC\_016845[C3113147T  
NC\_016845[C2860595G  
NC\_016845[C2325217T  
NC\_016845[G1918369A  
NC\_016845[A1146757G  
NC\_016845[G64471T  
NC\_016845[G971651A  
NC\_016845[G5283317A  
NC\_016845[G5252488A  
NC\_016845[C4700619T  
NC\_016845[G4480455T  
NC\_016845[C4368405T  
NC\_016845[G4300321T  
NC\_016845[G3754747A  
NC\_016845[C3612155T  
NC\_016845[C3048275G  
NC\_016845[C3018658A  
NC\_016845[T2957807C  
NC\_016845[G2734999A  
NC\_016845[T2182187A  
NC\_016845[C1770530T  
NC\_016845[G1122951A  
NC\_016845[G292355A  
NC\_016845[C915860A  
NC\_016845[A5059129C  
NC\_016845[C4989014T  
NC\_016845[T4838229A  
NC\_016845[T4527889C  
NC\_016845[G3324822A  
NC\_016845[C3115579A  
NC\_016845[T2962508A  
NC\_016845[G2947477T  
NC\_016845[C2886631T  
NC\_016845[A2835951C  
NC\_016845[G2752963T  
NC\_016845[A2605443T  
NC\_016845[C2240612A  
NC\_016845[C2054347A  
NC\_016845[A1944198T  
NC\_016845[G1747609A  
NC\_016845[G1729666T  
NC\_016845[G1722967A  
NC\_016845[G1595511A  
NC\_016845[G1571177A  
NC\_016845[C1070179T  
NC\_016845[A1068392C  
NC\_016845[A1068382T  
NC\_016845[A1068368G  
NC\_016845[C1008501A  
NC\_016845[C939577T  
NC\_016845[A799235C  
NC\_016845[A583043G  
NC\_016845[T441190A  
NC\_016845[G397872A  
NC\_016845[G337531C  
NC\_016845[G322597A  
NC\_016845[A178694T  
NC\_016845[C275764A  
NC\_016845[G5170234A  
NC\_016845[G5170228A  
NC\_016845[T5170177C  
NC\_016845[G5037773A  
NC\_016845[C4940388A  
NC\_016845[C4837639T  
NC\_016845[G4745375T  
NC\_016845[G4560614T  
NC\_016845[G4550099C  
NC\_016845[C4113638T  
NC\_016845[T3904422C  
NC\_016845[A3838320C  
NC\_016845[T3835840G  
NC\_016845[A3580441T  
NC\_016845[C3533760G  
NC\_016845[G3486045T  
NC\_016845[T3232974G  
NC\_016845[A3201094G  
NC\_016845[A3156552G  
NC\_016845[C2917641T  
NC\_016845[C2880443T  
NC\_016845[G2603745A  
NC\_016845[T2231455C  
NC\_016845[G2223840A  
NC\_016845[A2218236G  
NC\_016845[C1919497A  
NC\_016845[A1769534C  
NC\_016845[A1713579G  
NC\_016845[C1598464T  
NC\_016845[C1510365T  
NC\_016845[G1243226A  
NC\_016845[G1199678C  
NC\_016845[C1168853A  
NC\_016845[A1096766T  
NC\_016845[A1045096G  
NC\_016845[C918384T  
NC\_016845[T869169A  
NC\_016845[C857804A  
NC\_016845[C802917T  
NC\_016845[A707025G  
NC\_016845[C58228T  
NC\_016845[C108774T  
NC\_016845[G5136600A  
NC\_016845[C5038697T  
NC\_016845[G4708870C  
NC\_016845[G4667171T  
NC\_016845[A4446191G  
NC\_016845[G4438333A  
NC\_016845[C4367593T  
NC\_016845[C4146967A  
NC\_016845[T3928231C  
NC\_016845[G3738248A  
NC\_016845[C3388532T  
NC\_016845[G3316904A  
NC\_016845[G3283324T  
NC\_016845[C3108994T  
NC\_016845[C3079794A  
NC\_016845[C3064567A  
NC\_016845[C2906798T  
NC\_016845[T2857879A  
NC\_016845[C2804105A  
NC\_016845[C2371548T  
NC\_016845[C2122225T  
NC\_016845[G2091804A  
NC\_016845[C2086507A  
NC\_016845[C1987631T  
NC\_016845[G1963246A  
NC\_016845[T1934573C  
NC\_016845[G176651T  
NC\_016845[T1766605C  
NC\_016845[C1690393T  
NC\_016845[G1565464A  
NC\_016845[G1478695A  
NC\_016845[C1382954T  
NC\_016845[T1128627A  
NC\_016845[G1106844C  
NC\_016845[C885433T  
NC\_016845[A829954C  
NC\_016845[T798868C  
NC\_016845[G265657C  
NC\_016845[C12411T  
NC\_016845[T32998G  
NC\_016845[C590895T  
NC\_016845[A5000762G  
NC\_016845[C4775439A  
NC\_016845[G4475836A  
NC\_016845[G4093301A  
NC\_016845[C3492177G  
NC\_016845[A3479031G  
NC\_016845[C3448112A  
NC\_016845[G3047062A  
NC\_016845[A2607172T  
NC\_016845[C2216208G  
NC\_016845[G2201591A  
NC\_016845[G1793812T  
NC\_016845[G1628620T  
NC\_016845[G1502699T  
NC\_016845[A1440407C  
NC\_016845[G1411141T  
NC\_016845[G571470C  
NC\_016845[G145135A  
NC\_016845[G336724A  
NC\_016845[G3886962A  
NC\_016845[C145010T  
NC\_016845[G1437926A  
NC\_016845[C115603T  
NC\_016845[C3801714G  
NC\_016845[G2249333T  
NC\_016845[C1206996T  
NC\_016845[G1600909T

Z26

Z26

Z33

Z38

Z06

Z18

Z03

Z05

Z20

Z12

Z35

Supplementary Table 1. Primers used in the study

| Items         | Sequence                        |
|---------------|---------------------------------|
| <i>rmpA</i>   |                                 |
| Forward       | 5-ACTGGGCTACCTCTGCTTCA-3        |
| Reverse       | 5-CTTGCATGAGCCATCTTTCA-3        |
| <i>rmpA2</i>  |                                 |
| Forward       | 5-CTTTATGTGCAATAAG-GATGTT-3     |
| Reverse       | 5-CCTCCTGGAGAGTAAGCATT-3        |
| <i>rmpA</i>   |                                 |
| Forward       | 5-GTAATAGAGATATAAATATCATATTGA-3 |
| Reverse       | 5-GCAATGGCCATTGCGTTAG-3         |
| <i>iroB</i>   |                                 |
| Forward       | 5-ATCTCATCATCTACCTCCGCTC-3      |
| Reverse       | 5-GGTTGCGCCGTCGTTTTCAA-3        |
| <i>iucA</i>   |                                 |
| Forward       | 5-AATCAATGGCTATCCCGCTG-3        |
| Reverse       | 5-CGCTTCACTTCTTCACTGACAGG-3     |
| <i>peg344</i> |                                 |
| Forward       | 5-CTTGAAACAGACCCTCCAGTC-3       |
| Reverse       | 5-CCAGCGAATATAATAACCC-3         |
| <i>peg589</i> |                                 |
| Forward       | 5-TGAACCCCATGAGGTCTATC-3        |
| Reverse       | 5-GTGATGAATACCACTGCGGC-3        |
| <i>K1</i>     |                                 |
| Forward       | 5-GTAGGTATTGCAAGCCATGC-3        |
| Reverse       | 5-GCCCAGGTTAATGAATCCGT-3        |
| <i>K2</i>     |                                 |
| Forward       | 5-GGAGCCATTGAATTCGGTG-3         |
| Reverse       | 5-TCCCTAGCACTGGCTTAAGT-3        |
| <i>K5</i>     |                                 |
| Forward       | 5-GCCACCTCTAAGCATATAGC-3        |
| Reverse       | 5-CGCACCAGTAATCCAACAG-3         |
| <i>K20</i>    |                                 |
| Forward       | 5-CCGATTCGGTCAACTAGCTT-3        |
| Reverse       | 5-GCACCTCTATGAACTTTCAG-3        |
| <i>K54</i>    |                                 |
| Forward       | 5-CATTAGCTCAGTGGTTGGCT-3        |
| Reverse       | 5-GCTTGACAAACACCATAGCAG-3       |
| <i>K57</i>    |                                 |
| Forward       | 5-CGACAAATCTCTCTGACGA-3         |
| Reverse       | 5-CGCGACAAACATAACACTCG-3        |
| <i>rpoB</i>   |                                 |
| Forward       | 5-GGCGAAATGGCWGAGAACCA-3        |
| Reverse       | 5-GAGTCTTCGAAGTTGTAACC-3        |

*gapA*

Forward 5-TGAAATATGACTCCACTCACGG-3  
Reverse 5-CTTCAGAAGCGGCTTTGATGGCTT-3

*mdh*

Forward 5-TGAAATATGACTCCACTCACGG-3  
Reverse 5-CTTCAGAAGCGGCTTTGATGGCTT-3

*pgi*

Forward 5-GAGAAAAACCTGCCTGTACTGCTGGC-3  
Reverse 5-CGCGCCACGCTTTATAGCGGTTAAT-3

*phoE*

Forward 5-ACCTACCGCAACACCGACTTCTTCGG-3  
Reverse 5-TGATCAGAAGTGGTAGGTGAT-3

*infB*

Forward 5-CTCGCTGCTGGACTATATTCG-3  
Reverse 5-CGCTTTCAGCTCAAGAACTTC-3

*tonB*

Forward 5-CTTTATACCTCGGTACATCAGTT-3  
Reverse 5-ATTCGCCGGCTGRGCRGAGAG-3

---

Supplementary table 2. The number of different SNP among all the ST11 *Klebsiella pneumoniae* strains was shown referenced by HS11286.

| Item | Z01 | Z09 | Z29 | Z24 | Z23 | Z07 | Z17 | Z25 | Z19 | Z27 | Z32 | Z15 | Z22 | Z03 | Z33 | Z18 | Z06 | Z38 | Z35 | Z26 | Z36 | Z20 | Z12 | Z13 | Z21 | Z31 | Z04 | Z10 | Z28 | Z37 |
|------|-----|-----|-----|-----|-----|-----|-----|-----|-----|-----|-----|-----|-----|-----|-----|-----|-----|-----|-----|-----|-----|-----|-----|-----|-----|-----|-----|-----|-----|-----|
| Z01  | 0   | 4   | 6   | 37  | 38  | 46  | 47  | 47  | 49  | 50  | 54  | 58  | 58  | 73  | 74  | 74  | 75  | 75  | 76  | 80  | 83  | 86  | 98  | 139 | 816 | 824 | 832 | 845 | 847 | 854 |
| Z09  | 4   | 0   | 4   | 37  | 38  | 46  | 47  | 47  | 49  | 50  | 54  | 58  | 58  | 73  | 74  | 74  | 75  | 75  | 76  | 80  | 83  | 86  | 98  | 139 | 816 | 824 | 832 | 845 | 847 | 854 |
| Z29  | 6   | 4   | 0   | 39  | 40  | 48  | 49  | 49  | 51  | 52  | 56  | 60  | 60  | 75  | 76  | 76  | 77  | 77  | 78  | 82  | 85  | 88  | 100 | 141 | 818 | 826 | 834 | 847 | 849 | 856 |
| Z24  | 37  | 37  | 39  | 0   | 31  | 47  | 48  | 48  | 50  | 51  | 55  | 59  | 59  | 74  | 75  | 75  | 76  | 76  | 77  | 81  | 84  | 87  | 99  | 140 | 817 | 825 | 833 | 846 | 848 | 855 |
| Z23  | 38  | 38  | 40  | 31  | 0   | 48  | 49  | 49  | 51  | 52  | 56  | 60  | 60  | 75  | 76  | 76  | 77  | 77  | 78  | 82  | 85  | 88  | 100 | 141 | 818 | 826 | 834 | 847 | 849 | 856 |
| Z07  | 46  | 46  | 48  | 47  | 48  | 0   | 7   | 7   | 7   | 8   | 52  | 56  | 56  | 71  | 72  | 72  | 73  | 73  | 74  | 78  | 81  | 84  | 96  | 137 | 814 | 822 | 830 | 843 | 845 | 852 |
| Z17  | 47  | 47  | 49  | 48  | 49  | 7   | 0   | 8   | 10  | 11  | 53  | 57  | 57  | 72  | 73  | 73  | 74  | 74  | 75  | 79  | 82  | 85  | 97  | 138 | 815 | 823 | 831 | 844 | 846 | 853 |
| Z25  | 47  | 47  | 49  | 48  | 49  | 7   | 8   | 0   | 10  | 11  | 53  | 57  | 57  | 72  | 73  | 73  | 74  | 74  | 73  | 79  | 82  | 83  | 97  | 138 | 815 | 823 | 831 | 844 | 846 | 851 |
| Z19  | 49  | 49  | 51  | 50  | 51  | 7   | 10  | 10  | 0   | 1   | 55  | 59  | 59  | 74  | 75  | 75  | 76  | 76  | 77  | 81  | 84  | 87  | 99  | 140 | 817 | 825 | 833 | 846 | 848 | 855 |
| Z27  | 50  | 50  | 52  | 51  | 52  | 8   | 11  | 11  | 1   | 0   | 56  | 60  | 60  | 75  | 76  | 76  | 77  | 77  | 78  | 82  | 85  | 88  | 100 | 141 | 818 | 826 | 834 | 847 | 849 | 856 |
| Z32  | 54  | 54  | 56  | 55  | 56  | 52  | 53  | 53  | 55  | 56  | 0   | 40  | 40  | 77  | 78  | 78  | 79  | 79  | 80  | 84  | 87  | 90  | 102 | 121 | 820 | 828 | 836 | 849 | 851 | 858 |
| Z15  | 58  | 58  | 60  | 59  | 60  | 56  | 57  | 57  | 59  | 60  | 40  | 0   | 4   | 81  | 82  | 82  | 83  | 83  | 84  | 88  | 91  | 94  | 106 | 89  | 824 | 832 | 840 | 853 | 855 | 862 |
| Z22  | 58  | 58  | 60  | 59  | 60  | 56  | 57  | 57  | 59  | 60  | 40  | 4   | 0   | 81  | 82  | 82  | 83  | 83  | 84  | 88  | 91  | 94  | 106 | 89  | 824 | 832 | 840 | 853 | 855 | 862 |
| Z03  | 73  | 73  | 75  | 74  | 75  | 71  | 72  | 72  | 74  | 75  | 77  | 81  | 81  | 0   | 1   | 1   | 2   | 2   | 37  | 63  | 66  | 69  | 59  | 162 | 799 | 807 | 815 | 828 | 830 | 837 |
| Z33  | 74  | 74  | 76  | 75  | 76  | 72  | 73  | 73  | 75  | 76  | 78  | 82  | 82  | 1   | 0   | 2   | 3   | 1   | 38  | 64  | 67  | 70  | 60  | 163 | 800 | 808 | 816 | 829 | 831 | 838 |
| Z18  | 74  | 74  | 76  | 75  | 76  | 72  | 73  | 73  | 75  | 76  | 78  | 82  | 82  | 1   | 2   | 0   | 3   | 3   | 38  | 64  | 67  | 70  | 60  | 163 | 800 | 808 | 816 | 829 | 831 | 838 |
| Z06  | 75  | 75  | 77  | 76  | 77  | 73  | 74  | 74  | 76  | 77  | 79  | 83  | 83  | 2   | 3   | 3   | 0   | 4   | 39  | 65  | 68  | 71  | 61  | 164 | 801 | 809 | 817 | 830 | 832 | 839 |
| Z38  | 75  | 75  | 77  | 76  | 77  | 73  | 74  | 74  | 76  | 77  | 79  | 83  | 83  | 2   | 1   | 3   | 4   | 0   | 39  | 65  | 68  | 71  | 61  | 164 | 801 | 809 | 817 | 830 | 832 | 839 |
| Z35  | 76  | 76  | 78  | 77  | 78  | 74  | 75  | 73  | 77  | 78  | 80  | 84  | 84  | 37  | 38  | 38  | 39  | 39  | 0   | 66  | 69  | 70  | 62  | 165 | 802 | 810 | 818 | 831 | 833 | 838 |
| Z26  | 80  | 80  | 82  | 81  | 82  | 78  | 79  | 79  | 81  | 82  | 84  | 88  | 88  | 63  | 64  | 64  | 65  | 65  | 66  | 0   | 3   | 76  | 88  | 169 | 804 | 812 | 820 | 833 | 835 | 842 |
| Z36  | 83  | 83  | 85  | 84  | 85  | 81  | 82  | 82  | 84  | 85  | 87  | 91  | 91  | 66  | 67  | 67  | 68  | 68  | 69  | 3   | 0   | 79  | 91  | 172 | 807 | 815 | 823 | 836 | 838 | 845 |
| Z20  | 86  | 86  | 88  | 87  | 88  | 84  | 85  | 83  | 87  | 88  | 90  | 94  | 94  | 69  | 70  | 70  | 71  | 71  | 70  | 76  | 79  | 0   | 94  | 175 | 812 | 820 | 828 | 841 | 843 | 848 |
| Z12  | 98  | 98  | 100 | 99  | 100 | 96  | 97  | 97  | 99  | 100 | 102 | 106 | 106 | 59  | 60  | 60  | 61  | 61  | 62  | 88  | 91  | 94  | 0   | 187 | 824 | 832 | 840 | 853 | 855 | 862 |

|     |     |     |     |     |     |     |     |     |     |     |     |     |     |     |     |     |     |     |     |     |     |     |     |     |     |     |     |     |     |     |
|-----|-----|-----|-----|-----|-----|-----|-----|-----|-----|-----|-----|-----|-----|-----|-----|-----|-----|-----|-----|-----|-----|-----|-----|-----|-----|-----|-----|-----|-----|-----|
| Z13 | 139 | 139 | 141 | 140 | 141 | 137 | 138 | 138 | 140 | 141 | 121 | 89  | 89  | 162 | 163 | 163 | 164 | 164 | 165 | 169 | 172 | 175 | 187 | 0   | 905 | 913 | 921 | 934 | 936 | 943 |
| Z21 | 816 | 816 | 818 | 817 | 818 | 814 | 815 | 815 | 817 | 818 | 820 | 824 | 824 | 799 | 800 | 800 | 801 | 801 | 802 | 804 | 807 | 812 | 824 | 905 | 0   | 52  | 36  | 55  | 57  | 64  |
| Z31 | 824 | 824 | 826 | 825 | 826 | 822 | 823 | 823 | 825 | 826 | 828 | 832 | 832 | 807 | 808 | 808 | 809 | 809 | 810 | 812 | 815 | 820 | 832 | 913 | 52  | 0   | 68  | 81  | 83  | 90  |
| Z04 | 832 | 832 | 834 | 833 | 834 | 830 | 831 | 831 | 833 | 834 | 836 | 840 | 840 | 815 | 816 | 816 | 817 | 817 | 818 | 820 | 823 | 828 | 840 | 921 | 36  | 68  | 0   | 71  | 73  | 80  |
| Z10 | 845 | 845 | 847 | 846 | 847 | 843 | 844 | 844 | 846 | 847 | 849 | 853 | 853 | 828 | 829 | 829 | 830 | 830 | 831 | 833 | 836 | 841 | 853 | 934 | 55  | 81  | 71  | 0   | 6   | 13  |
| Z28 | 847 | 847 | 849 | 848 | 849 | 845 | 846 | 846 | 848 | 849 | 851 | 855 | 855 | 830 | 831 | 831 | 832 | 832 | 833 | 835 | 838 | 843 | 855 | 936 | 57  | 83  | 73  | 6   | 0   | 15  |
| Z37 | 854 | 854 | 856 | 855 | 856 | 852 | 853 | 851 | 855 | 856 | 858 | 862 | 862 | 837 | 838 | 838 | 839 | 839 | 838 | 842 | 845 | 848 | 862 | 943 | 64  | 90  | 80  | 13  | 15  | 0   |

The SNP of the core genome was the same between Z3 and Z5, Z13 and Z14, Z29 and Z39, respectively.



Supplementary table 3. Antimicrobial resistance profile of these MDR-Kp strains.

| No. | SAM | ATM | CIP | MEM   | TZP  | GEN | FEP | CRO | CAZ | CTT | CZO | TOB | IPM | LVX | AMK | CSL* | MNO* | TGC* |
|-----|-----|-----|-----|-------|------|-----|-----|-----|-----|-----|-----|-----|-----|-----|-----|------|------|------|
| Z1  | ≥32 | ≥64 | ≥4  | ≥16   | ≥128 | ≥16 | ≥64 | ≥64 | ≥64 | ≥64 | ≥64 | ≥16 | ≥16 | ≥8  | ≥64 | 6    | 12   | 16   |
| Z3  | ≥32 | ≥64 | ≥4  | ≥16   | ≥128 | ≥16 | ≥64 | ≥64 | ≥64 | ≥64 | ≥64 | ≥16 | ≥16 | ≥8  | ≥64 | 6    | 12   | 16   |
| Z4  | ≥32 | ≥64 | ≥4  | ≥16   | ≥128 | ≥16 | ≥64 | ≥64 | ≥64 | ≥64 | ≥64 | ≥16 | ≥16 | ≥8  | ≥64 | 6    | 19   | 21   |
| Z5  | ≥32 | ≥64 | ≥4  | ≥16   | ≥128 | ≥16 | ≥64 | ≥64 | ≥64 | ≥64 | ≥64 | ≥16 | ≥16 | ≥8  | ≥64 | 7    | 12   | 16   |
| Z6  | ≥32 | ≥64 | ≥4  | ≥16   | ≥128 | ≥16 | ≥64 | ≥64 | ≥64 | ≥64 | ≥64 | ≥16 | ≥16 | ≥8  | ≥64 | 6    | 18   | 20   |
| Z7  | ≥32 | ≥64 | ≥4  | ≥16   | ≥128 | ≥16 | ≥64 | ≥64 | 16  | ≥64 | ≥64 | ≥16 | ≥16 | ≥8  | ≤2  | 10   | 15   | 19   |
| Z9  | ≥32 | ≥64 | ≥4  | ≥16   | ≥128 | ≥16 | ≥64 | ≥64 | ≥64 | ≥64 | ≥64 | ≥16 | ≥16 | ≥8  | ≥64 | 6    | 16   | 23   |
| Z10 | ≥32 | ≥64 | ≥4  | ≥16   | ≥128 | ≤1  | ≥64 | ≥64 | ≥64 | ≥64 | ≥64 | ≤1  | ≥16 | ≥8  | ≤2  | 6    | 17   | 19   |
| Z12 | ≥32 | ≥64 | ≥4  | ≥16   | ≥128 | ≤1  | ≥64 | 16  | 16  | 16  | 16  | ≤1  | ≥16 | ≥8  | ≤2  | 6    | 17   | 19   |
| Z13 | ≥32 | ≥64 | ≥4  | ≥16   | ≥128 | ≥16 | ≥64 | ≥64 | ≥64 | ≥64 | ≥64 | 4   | ≥16 | ≥8  | ≤2  | 8    | 11   | 19   |
| Z14 | ≥32 | ≥64 | ≥4  | ≥16   | ≥128 | ≥16 | ≥64 | ≥64 | ≥64 | ≥64 | ≥64 | 4   | ≥16 | ≥8  | ≤2  | 6    | 14   | 16   |
| Z15 | ≥32 | ≥64 | ≥4  | ≥16   | ≥128 | ≥16 | ≥64 | ≥64 | ≥64 | ≥64 | ≥64 | 8   | ≥16 | ≥8  | ≤2  | 6    | 14   | 20   |
| Z17 | ≥32 | ≥64 | ≥4  | ≥16   | ≥128 | ≥16 | ≥64 | ≥64 | ≥64 | ≥64 | ≥64 | ≥16 | ≥16 | ≥8  | ≥64 | 6    | 8    | 19   |
| Z18 | ≥32 | ≥64 | ≥4  | ≥16   | ≥128 | ≥16 | ≥64 | ≥64 | 16  | ≥64 | ≥64 | ≥16 | ≥16 | ≥8  | ≥64 | 8    | 20   | 21   |
| Z19 | ≥32 | ≥64 | ≥4  | ≥16   | ≥128 | ≥16 | ≥64 | ≥64 | ≥64 | ≥64 | ≥64 | ≥16 | 8   | ≥8  | ≥64 | 6    | 15   | 15   |
| Z20 | ≥32 | ≥64 | ≥4  | ≥16   | ≥128 | ≤1  | ≥64 | ≥64 | ≥64 | ≥64 | ≥64 | ≤1  | ≥16 | ≥8  | ≤2  | 6    | 18   | 20   |
| Z21 | ≥32 | ≥64 | ≥4  | ≥16   | ≥128 | ≤1  | ≥64 | ≥64 | ≥64 | ≥64 | ≥64 | ≤1  | ≥16 | ≥8  | ≤2  | 6    | 18   | 20   |
| Z22 | ≥32 | ≥64 | ≥4  | ≥16   | ≥128 | ≥16 | ≥64 | ≥64 | ≥64 | ≥64 | ≥64 | 4   | ≥16 | ≥8  | ≤2  | 6    | 6    | 13   |
| Z23 | ≥32 | ≥64 | ≥4  | ≥16   | ≥128 | ≥16 | ≥64 | ≥64 | ≥64 | ≥64 | ≥64 | ≥16 | ≥16 | ≥8  | ≥64 | 6    | 18   | 21   |
| Z24 | ≥32 | ≥64 | ≥4  | ≥16   | ≥128 | ≥16 | ≥64 | ≥64 | 16  | ≥64 | ≥64 | ≥16 | ≥16 | ≥8  | ≤2  | 11   | 16   | 19   |
| Z25 | ≥32 | ≥64 | ≥4  | ≥16   | ≥128 | ≥16 | ≥64 | ≥64 | ≥64 | ≥64 | ≥64 | ≥16 | ≥16 | ≥8  | ≥64 | 7    | 16   | 20   |
| Z26 | ≥32 | ≥64 | ≥4  | ≥16   | ≥128 | ≥16 | ≥64 | ≥64 | ≥64 | ≥64 | ≥64 | ≥16 | ≥16 | ≥8  | ≥64 | 6    | 20   | 22   |
| Z27 | ≥32 | ≥64 | ≥4  | ≥16   | ≥128 | ≥16 | ≥64 | ≥64 | ≥64 | ≥64 | ≥64 | ≥16 | ≥16 | ≥8  | ≥64 | 7    | 16   | 22   |
| Z28 | ≥32 | ≥64 | ≥4  | ≥16   | ≥128 | ≤1  | ≥64 | ≥64 | ≥64 | ≥64 | ≥64 | ≤1  | ≥16 | ≥8  | ≤2  | 6    | 20   | 20   |
| Z29 | ≥32 | ≥64 | ≥4  | ≥16   | ≥128 | ≥16 | ≥64 | ≥64 | ≥64 | ≥64 | ≥64 | ≥16 | ≥16 | ≥8  | ≥64 | 6    | 17   | 19   |
| Z31 | ≥32 | ≥64 | ≥4  | ≥16   | ≥128 | ≥16 | ≥64 | ≥64 | ≥64 | ≥64 | ≥64 | ≥16 | ≥16 | ≥8  | ≥64 | 6    | 16   | 19   |
| Z32 | ≥32 | 16  | ≥4  | ≤0.25 | ≤4   | ≤1  | ≤1  | 16  | 16  | ≤4  | ≥64 | 4   | ≤1  | ≥8  | ≤2  | 22   | 7    | 20   |
| Z33 | ≥32 | ≥64 | ≥4  | ≥16   | ≥128 | ≥16 | 32  | ≥64 | 16  | ≥64 | ≥64 | ≥16 | ≥16 | ≥8  | ≥64 | 8    | 16   | 19   |
| Z35 | ≥32 | ≥64 | ≥4  | ≥16   | ≥128 | ≥16 | ≥64 | ≥64 | ≥64 | ≥64 | ≥64 | ≥16 | ≥16 | ≥8  | ≥64 | 6    | 8    | 13   |
| Z36 | ≥32 | ≥64 | ≥4  | ≥16   | ≥128 | ≥16 | ≥64 | ≥64 | ≥64 | ≥64 | ≥64 | ≥16 | ≥16 | ≥8  | ≥64 | 6    | 20   | 22   |
| Z37 | ≥32 | ≥64 | ≥4  | ≥16   | ≥128 | ≤1  | ≥64 | ≥64 | ≥64 | ≥64 | ≥64 | ≤1  | ≥16 | ≥8  | ≤2  | 6    | 21   | 21   |
| Z38 | ≥32 | ≥64 | ≥4  | ≥16   | ≥128 | ≥16 | 32  | ≥64 | 16  | ≥64 | ≥64 | ≥16 | ≥16 | ≥8  | ≥64 | 9    | 16   | 20   |
| Z39 | ≥32 | ≥64 | ≥4  | ≥16   | ≥128 | ≥16 | ≥64 | ≥64 | ≥64 | ≥64 | ≥64 | ≥16 | ≥16 | ≥8  | ≥64 | 6    | 13   | 28   |

\*: Antimicrobial resistance was detected by KB test.
